# Supplementary material
Source: Springer Nature journal article supplement (https://www.springermedizin.de/resource/supplementary/12885_2011_3098_MOESM13_ESM.pdf/9463230)

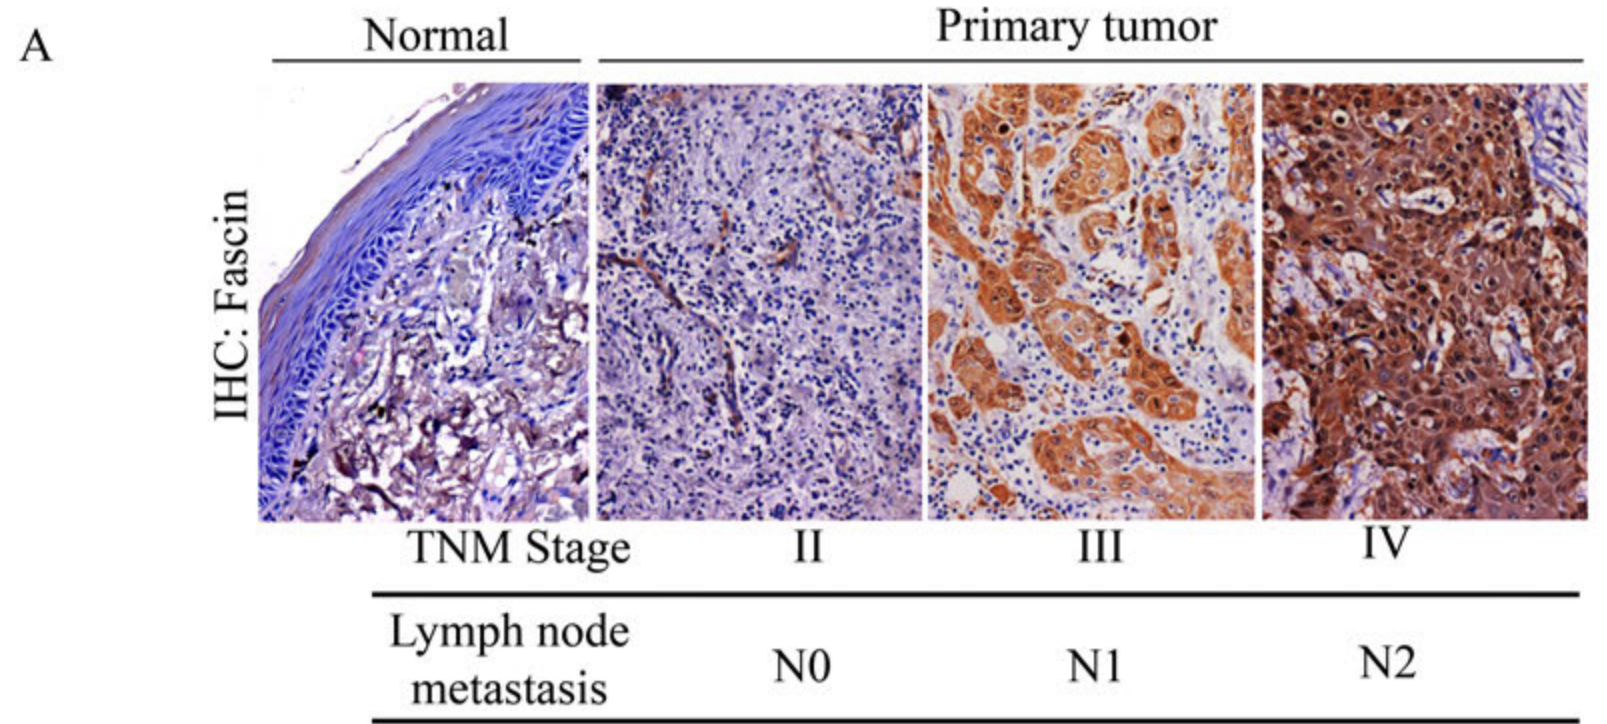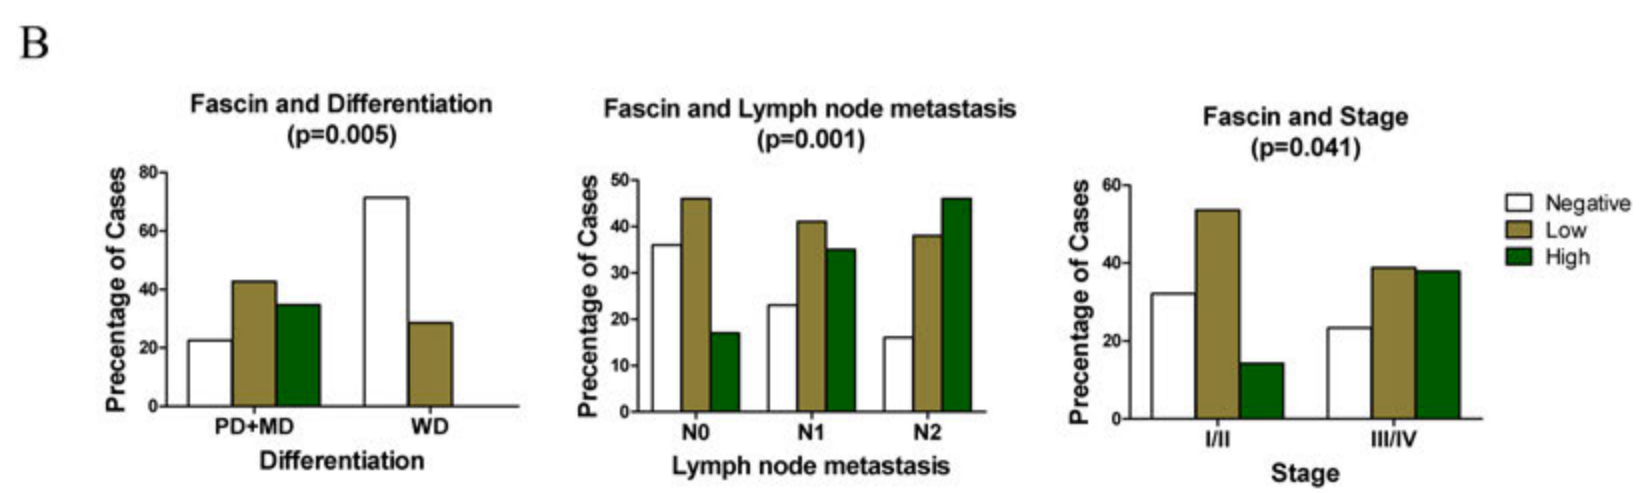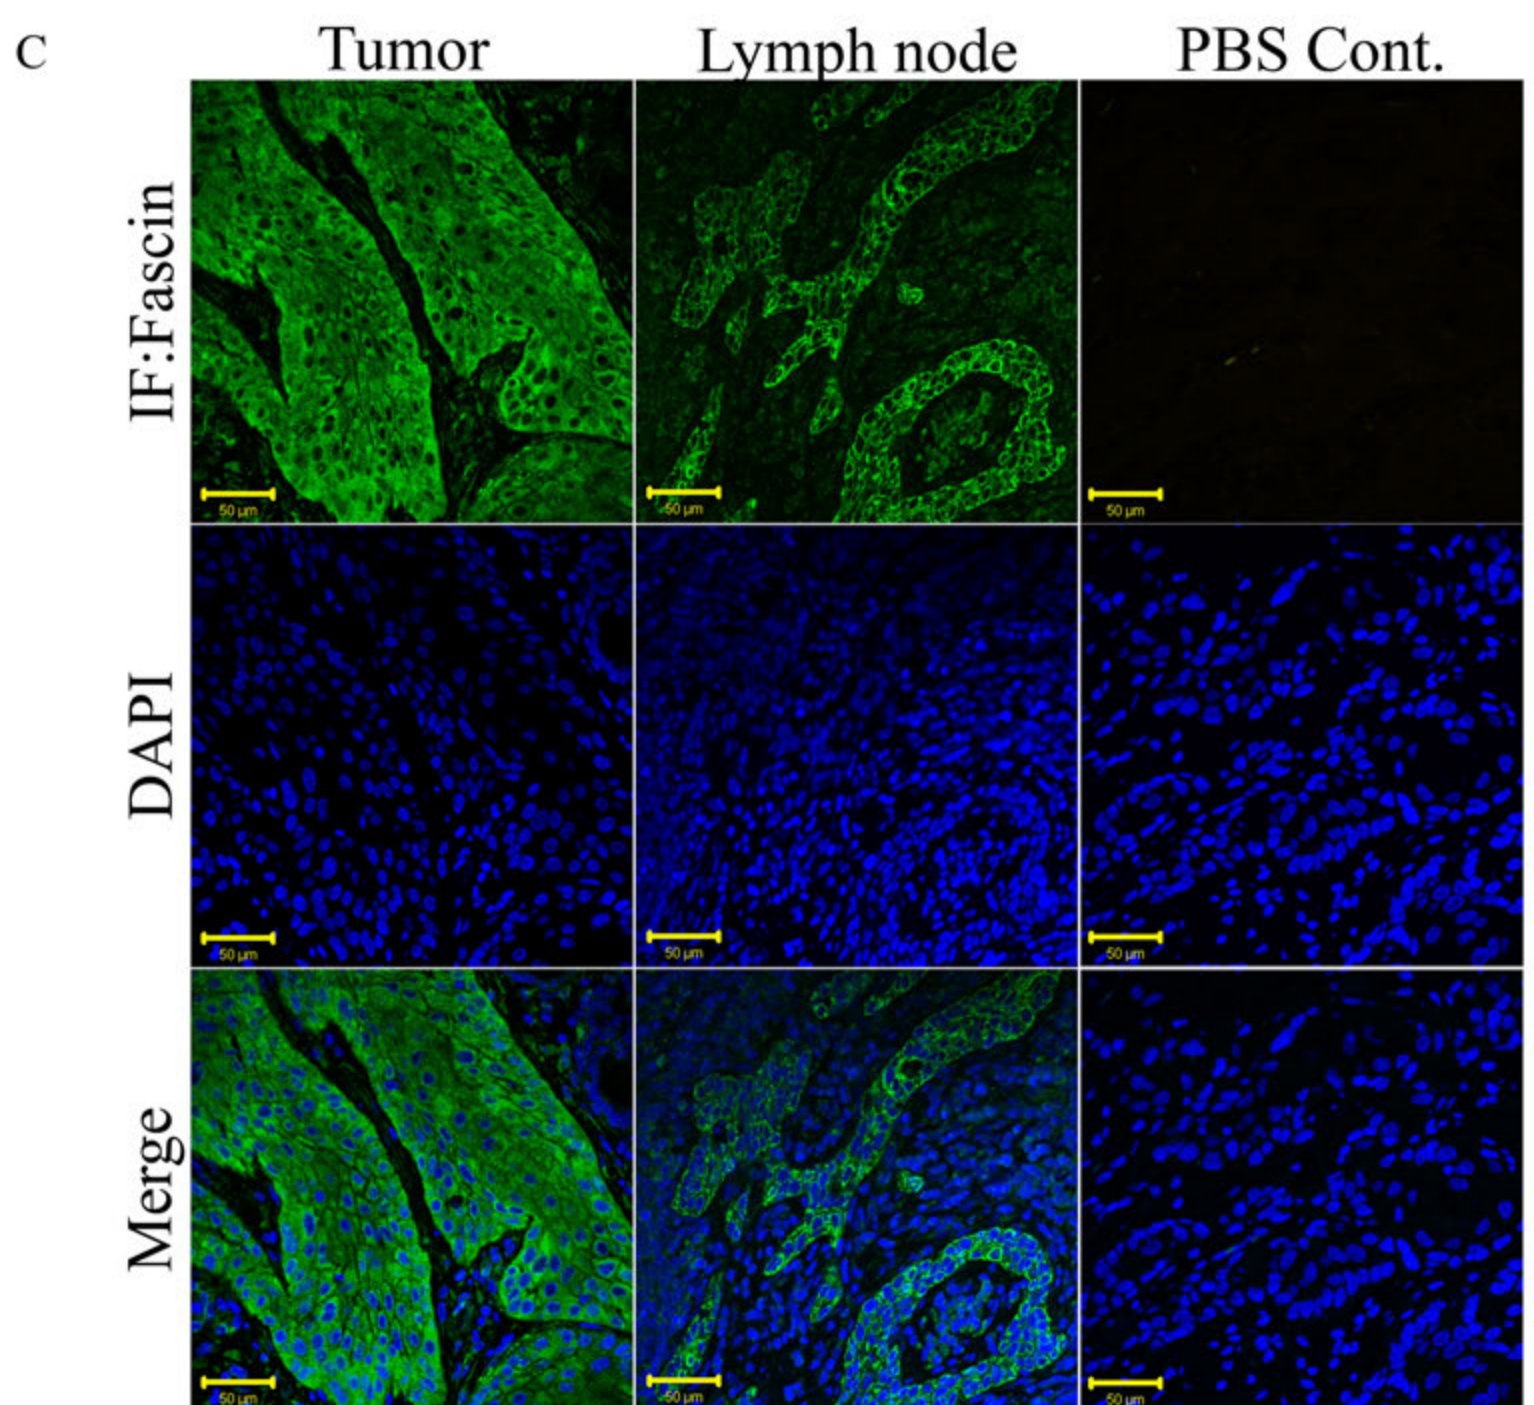

Supplement: MOESM13 [file 9463230]
